# Supplementary material for: Evaluating Postural Transition Movement Performance in Individuals with Essential Tremor via the Instrumented Timed Up and Go
Source: MDPI journal article supplement (doi:10.3390/s24072216), 2024-03-29
Supplement: s1 [file s1]

## Supplemental

**Table S1. Correlations between demographic and clinical characteristics and performance from the standard and water carry TUG assessments.**

| Measure                | Correlation (95% Confidence Interval) | p-value     |
|------------------------|---------------------------------------|-------------|
| <b>Standard TUG</b>    |                                       |             |
| Age                    | 0.437 (-0.114, 0.782)                 | 0.10        |
| TETRAS-ADL             | 0.357 (-0.231 -0.754)                 | 0.21        |
| TETRAS-Motor           | 0.224 (-0.341, 0.670)                 | 0.42        |
| ABC                    | -0.424 (-0.776, 0.130)                | 0.10        |
| FES                    | 0.494 (-0.04, 0.809)                  | 0.06        |
| MMSE                   | 0.555 (0.04, 0.836)                   | <b>0.03</b> |
| <b>Water Carry TUG</b> |                                       |             |
| Age                    | 0.388 (-0.171, 0.758)                 | .15         |
| TETRAS-ADL             | 0.612 (0.10, 0.867)                   | <b>.02</b>  |
| TETRAS-Motor           | 0.583 (0.09, 0.848)                   | <b>.02</b>  |
| ABC                    | -0.683 (-0.889, -0.247)               | <b>.01</b>  |
| FES                    | 0.574 (0.07, 0.844)                   | <b>.03</b>  |
| MMSE                   | 0.424 (-0.129, 0.776)                 | 0.11        |

*Note.* Spearman rho correlations and 95% confidence intervals for clinical and demographic characteristics of ET sample and total duration of the standard and water-carry TUG assessments. Significant correlations are highlighted in **bold**. TETRAS-ADL: The Essential Tremor Rating Assessment Scale-Activities of Daily Living Subscale; TETRAS-Motor: The Essential Tremor Rating Assessment Scale-Motor Subscale; ABC: Activities Specific Balance Confidence Scale; FES: Fall Efficacy Scale; MMSE: Mini-Mental State Exam.
